# Supplementary material for: Isolation, Purification and Tyrosinase Inhibitory Activity of Anthocyanins and Their Novel Degradation Compounds from Solanum tuberosum L
Source: MDPI journal article supplement (doi:10.3390/molecules29071492), 2024-03-27
Supplement: s1 [file s1]

## SUPPLEMENTARY MATERIAL

### Isolation, purification and tyrosinase inhibitory activity of anthocyanins and their novel degradation compounds from *Solanum tuberosum* L.

Jian Ouyang<sup>1,2,3</sup>, Na Hu<sup>1</sup> and Honglun Wang<sup>1,2,\*</sup>

<sup>1</sup> Qinghai Provincial Key Laboratory of Tibetan Medicine Research and CAS Key Laboratory of Tibetan Medicine Research, Northwest Institute of Plateau Biology, Xining 810008, PR China; huna@nwipb.cas.cn

<sup>2</sup> Huzhou China-Science Innovation Centre of Plateau Biology, Huzhou 313000, PR China; [yqzji@126.com](mailto:yqzji@126.com)

<sup>3</sup> University of Chinese Academy of Science, Beijing 100049, PR China; hlwang@nwipb.cas.cn

\* Correspondence: hlwang@nwipb.cas.cn

**Abstract:** To explore the composition of anthocyanins and expand their biological activities, anthocyanins were systematically isolated and purified from tubers of *Solanum tuberosum* L., and their tyrosinase inhibitory activity was investigated. In this study, two new anthocyanin degradation compounds, norpetanin (**9**) and 4-*O*-(*p*-coumaryl) rhamnose (**10**), along with 17 known anthocyanins and their derivatives, were isolated and purified from an acid-ethanolic extract of fresh purple potato tubers. Their structures were elucidated via 1D and 2D NMR and HR-ESI-MS and compared with those reported in the literature. The extracts were evaluated for anthocyanins and their derivatives using a tyrosinase inhibitor screening kit and molecular docking technology, and the results showed that petanin, norpetanin, 4-*O*-(*p*-coumaryl) rhamnose, and lyciruthenylpropanoid D/E possessed tyrosinase inhibitory activity, with 50% inhibiting concentration (IC<sub>50</sub>) values of 122.37 ± 8.03, 115.53 ± 7.51, 335.03 ± 12.99, and 156.27 ± 11.22 μM (Mean ± SEM, *n* = 3), respectively. Furthermore, petanin was validated against melanogenesis in zebrafish; it was found that it could significantly inhibit melanin pigmentation (*p* < 0.001), and the inhibition rate of melanin was 17% compared with the normal group. This finding may provide potential treatments for diseases with abnormal melanin production, and high-quality raw materials for whitening cosmetics.

**Keywords:** acylated anthocyanins; norpetanin; 4-*O*-(*p*-coumaryl) rhamnose; molecular docking; petanin; tyrosinase inhibitor.

## List of contents

**Figure S1.**  $^1\text{H}$  NMR spectrum (600 MHz,  $\text{CD}_3\text{OD}/\text{CF}_3\text{COOD}$  (9:1)) of **9**

**Figure S2.**  $^{13}\text{C}$  NMR spectrum (600 MHz,  $\text{CD}_3\text{OD}/\text{CF}_3\text{COOD}$  (9:1)) of **9**

**Figure S3.** HMBC spectrum and key HMBC correlations of **9**

**Figure S4.** HSQC spectrum of **9**

**Figure S5.**  $^1\text{H}$ ,  $^1\text{H}$ -COSY spectrum and key  $^1\text{H}$ ,  $^1\text{H}$ -COSY correlations of **9**

**Figure S6.** HR-ESI-MS spectrum of **9**

**Figure S7.**  $^1\text{H}$  NMR spectrum (800 MHz,  $\text{CD}_3\text{OD}$ ) of **10**

**Figure S8.**  $^{13}\text{C}$  NMR spectrum (800 MHz,  $\text{CD}_3\text{OD}$ ) of **10**

**Figure S9.** HMBC spectrum and key HMBC correlations of **10**

**Figure S10.** HSQC spectrum of **10**

**Figure S11.**  $^1\text{H}$ ,  $^1\text{H}$ -COSY spectrum and key  $^1\text{H}$ ,  $^1\text{H}$ -COSY correlations of **10**

**Figure S12.**  $^1\text{H}$  NMR spectrum (600 MHz,  $\text{CD}_3\text{OD}/\text{CF}_3\text{COOD}$  (9:1)) of **3**

**Figure S13.**  $^1\text{H}$  NMR spectrum (600 MHz,  $\text{CD}_3\text{OD}/\text{CF}_3\text{COOD}$  (9:1)) of **12**

**Figure S14.**  $^1\text{H}$  NMR spectrum (600 MHz,  $\text{CD}_3\text{OD}/\text{CF}_3\text{COOD}$  (9:1)) of **15**

**Figure S15.** HPLC chromatography of *Solanum tuberosum* L. extract (A) and Fr.1~Fr.4 (B~E)

**Figure S16.** HPLC chromatography and spectrogram of **1~9**

**Figure S17.** HPLC chromatography and spectrogram of **10~19**

**Figure S18.** ADMET of (A) petanin, (B) norpetanin, (C) 4-O-(p-coumaryl) rhamnose, (D) Lyciruthphenylpropanoid D/E

**Table S1.** Retention time, purity and  $\lambda_{\text{max}}$  of anthocyanins and their degradation products by HPLC

**Table S2.** Tyrosinase inhibitory activity of anthocyanins and their degradation products (0.60 mM)

**Table S3.** Maximum tolerated concentration of petanin in zebrafish (n=30)

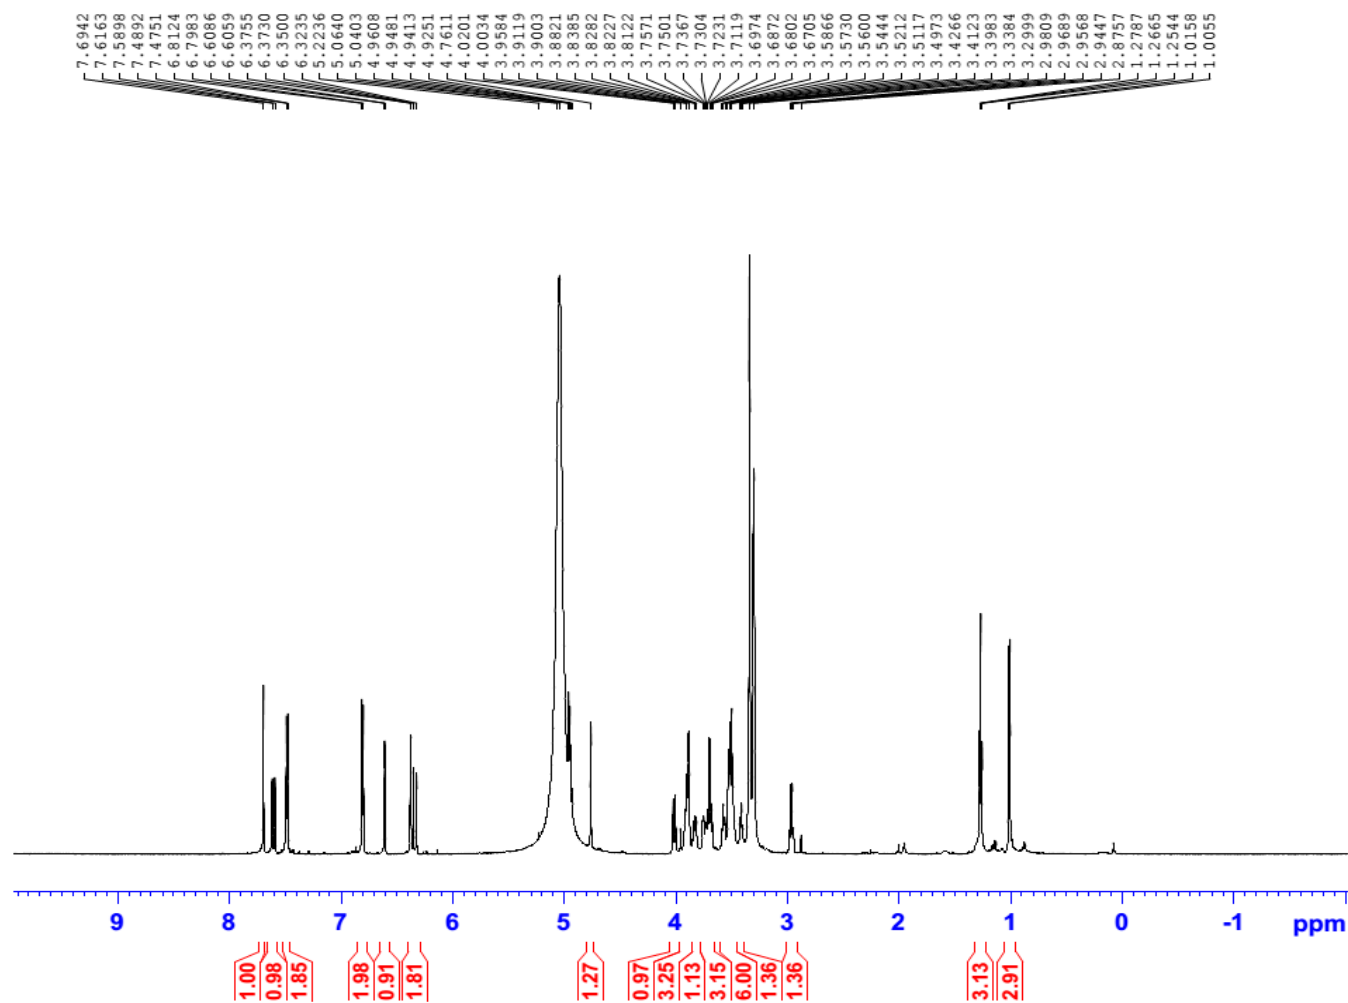

**Figure S1.**  $^1\text{H}$  NMR spectrum (600 MHz,  $\text{CD}_3\text{OD}/\text{CF}_3\text{COOD}$  (9:1)) of **9**

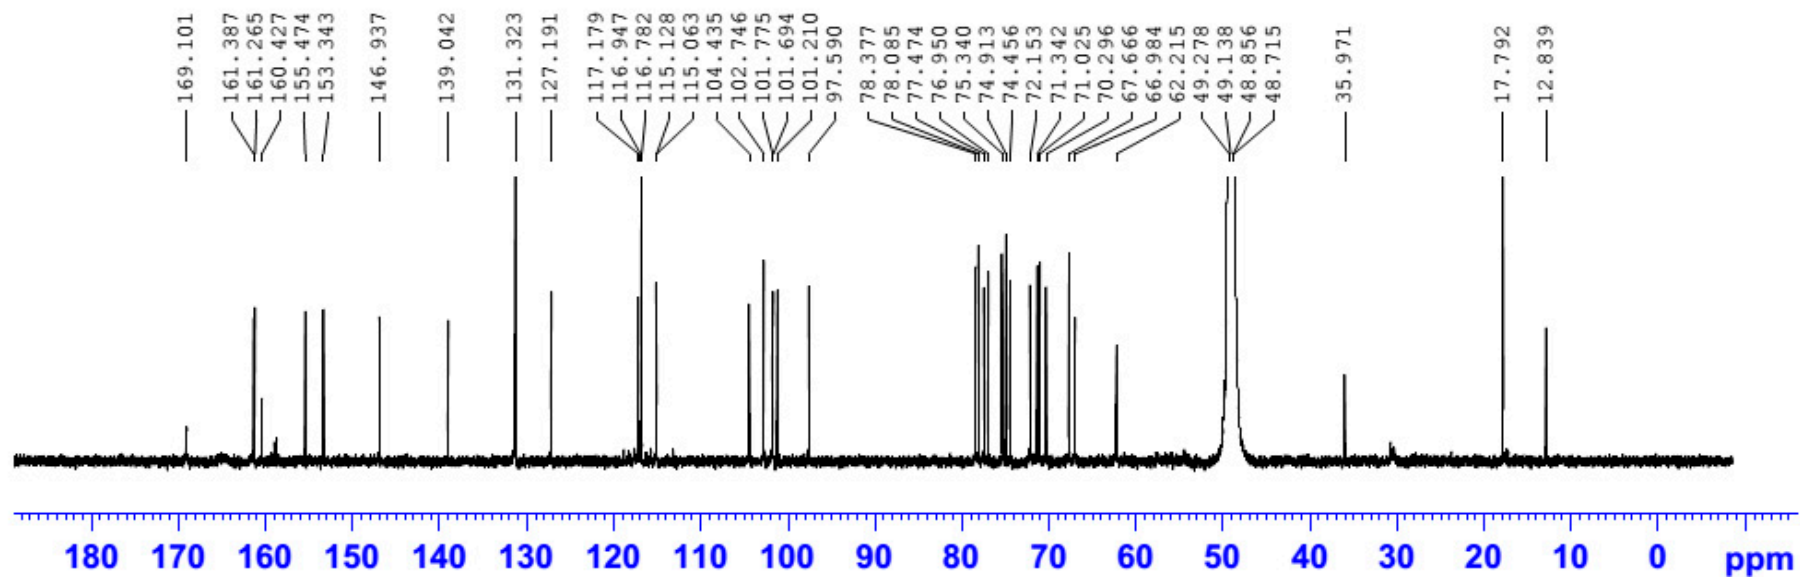

**Figure S2.** <sup>13</sup>C NMR spectrum (600 MHz, CD<sub>3</sub>OD/CF<sub>3</sub>COOD (9:1)) of 9

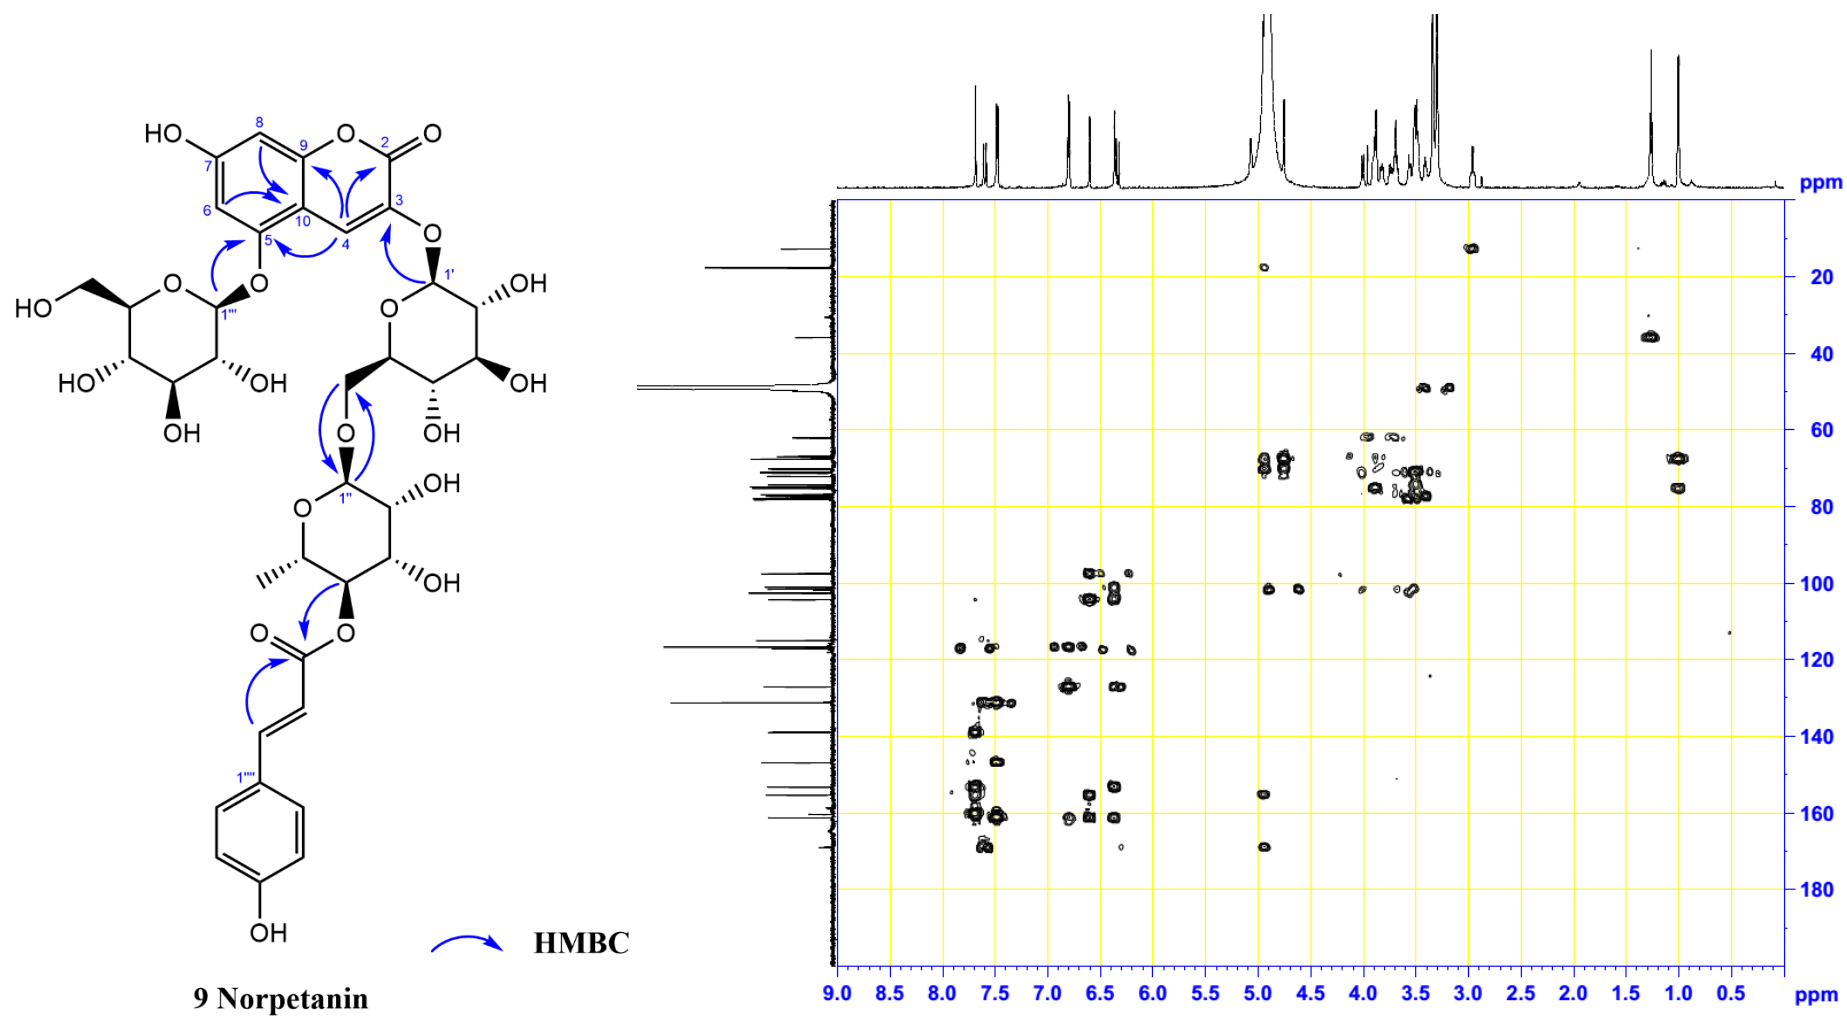

Figure S3. HMBC spectrum and key HMBC correlations of **9**

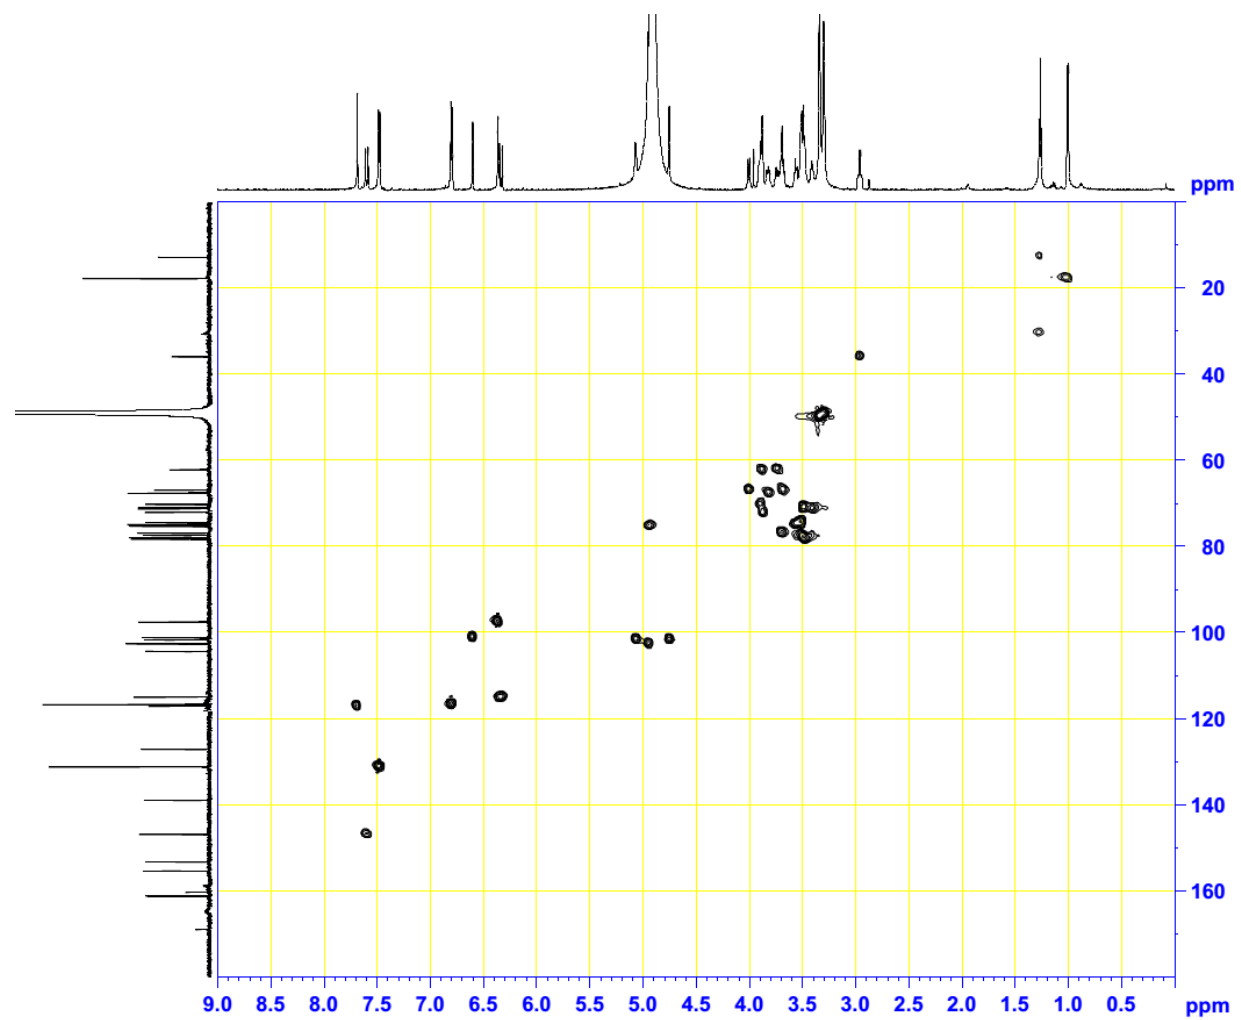

Figure S4. HSQC spectrum of 9

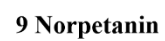

\_\_\_\_\_

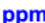

**Figure S5.**  $^1\text{H}$ ,  $^1\text{H}$ -COSY spectrum and key  $^1\text{H}$ ,  $^1\text{H}$ -COSY correlations of **9**

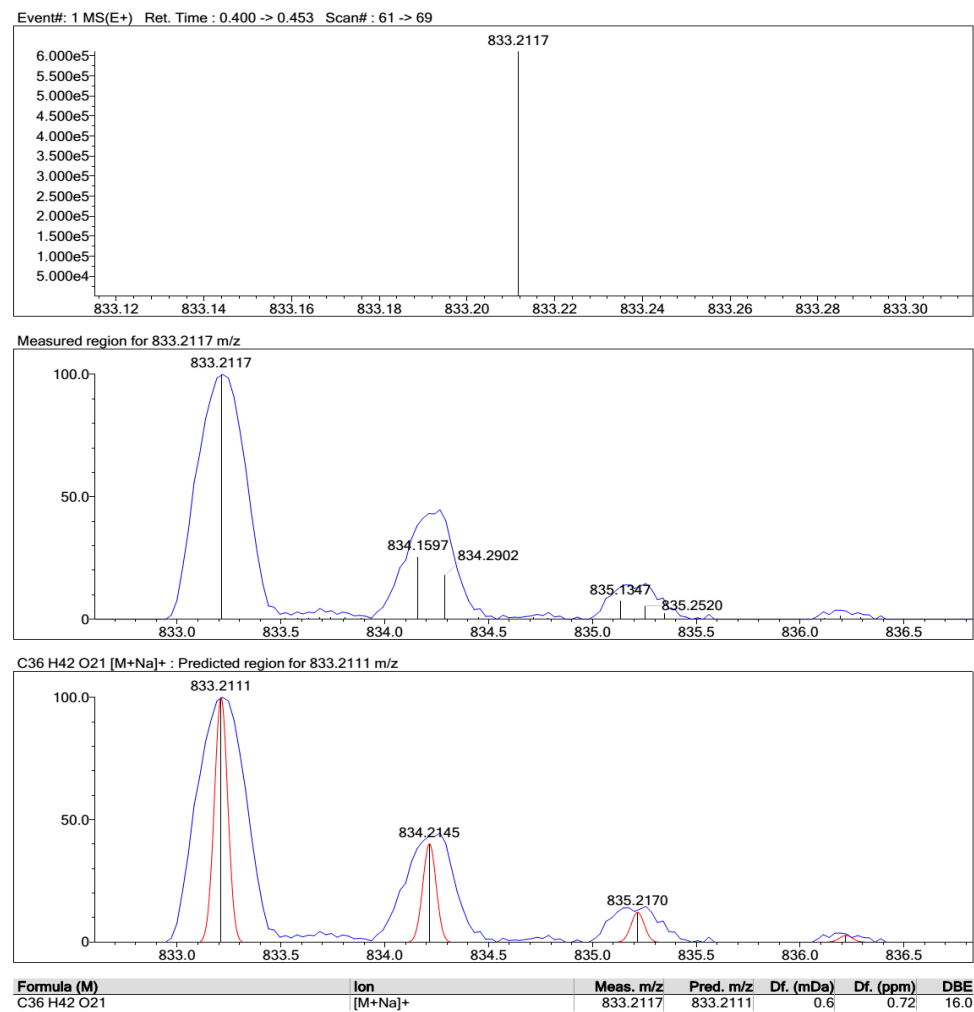

**Figure S6.** HR-ESI-MS spectrum of **9**



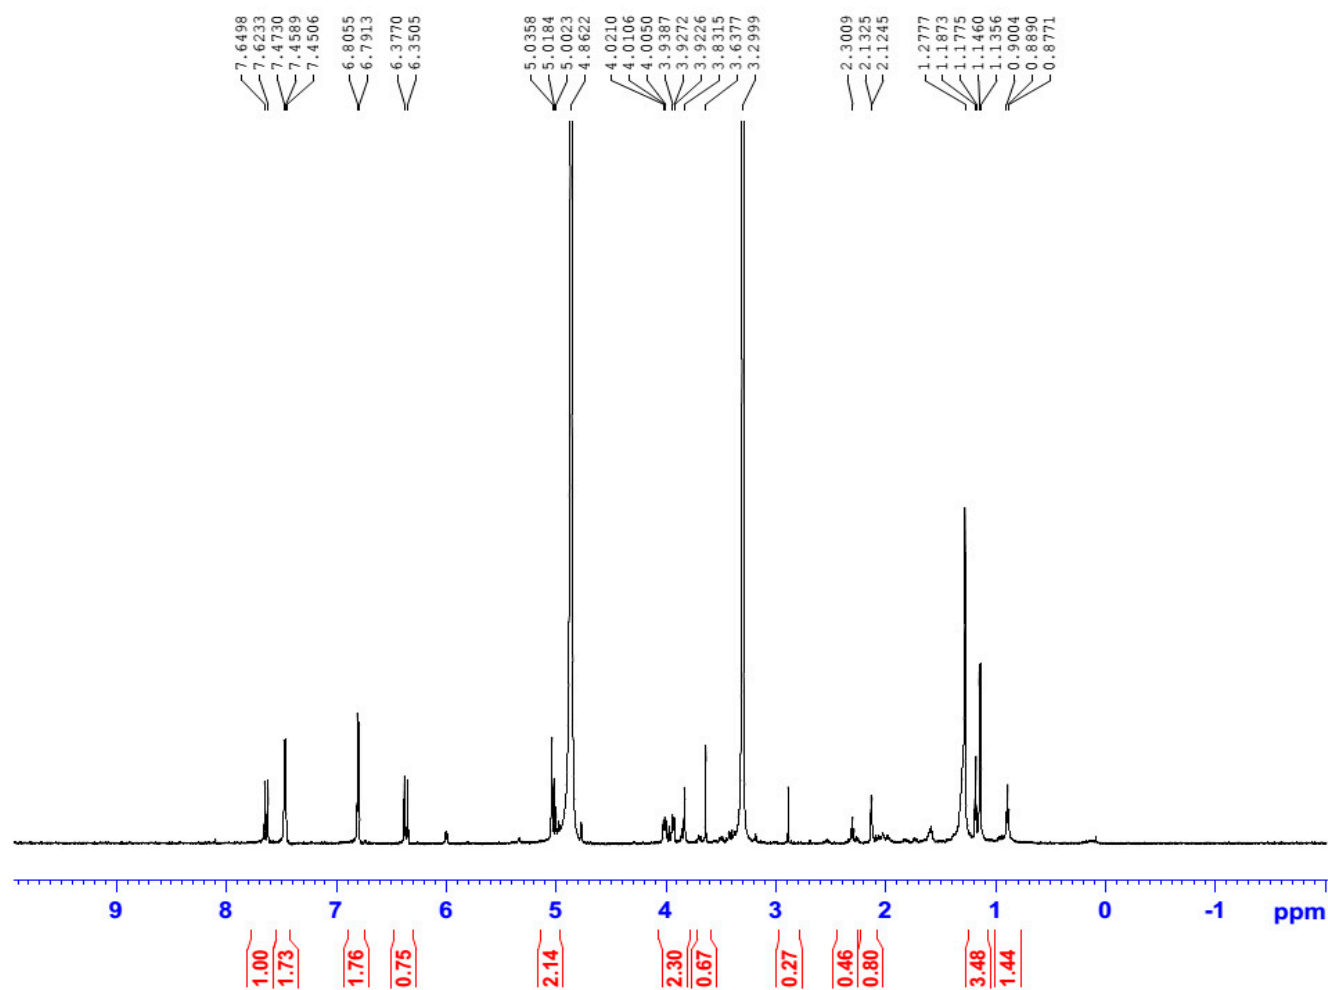

Figure S7. <sup>1</sup>H NMR spectrum (800 MHz, CD<sub>3</sub>OD) of 10

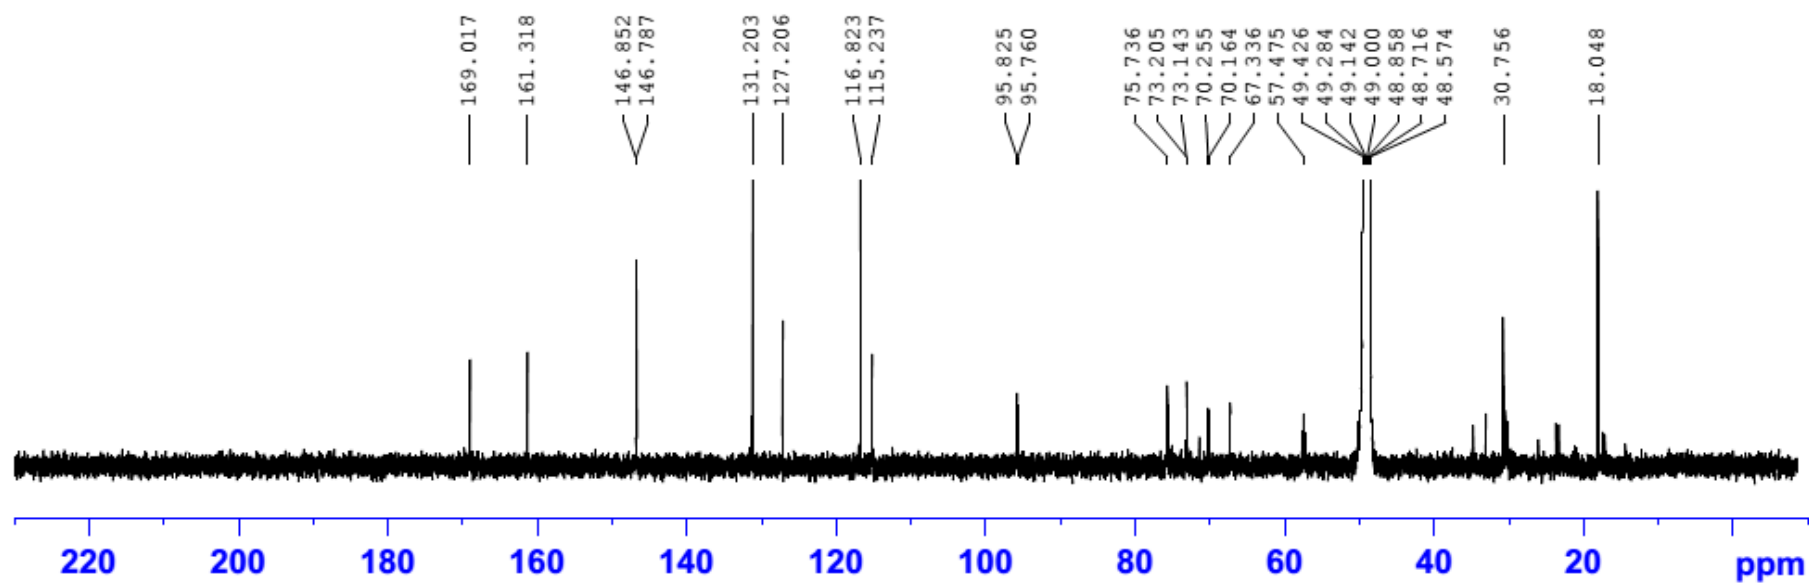

Figure S8. <sup>13</sup>C NMR spectrum (800 MHz, CD<sub>3</sub>OD) of **10**

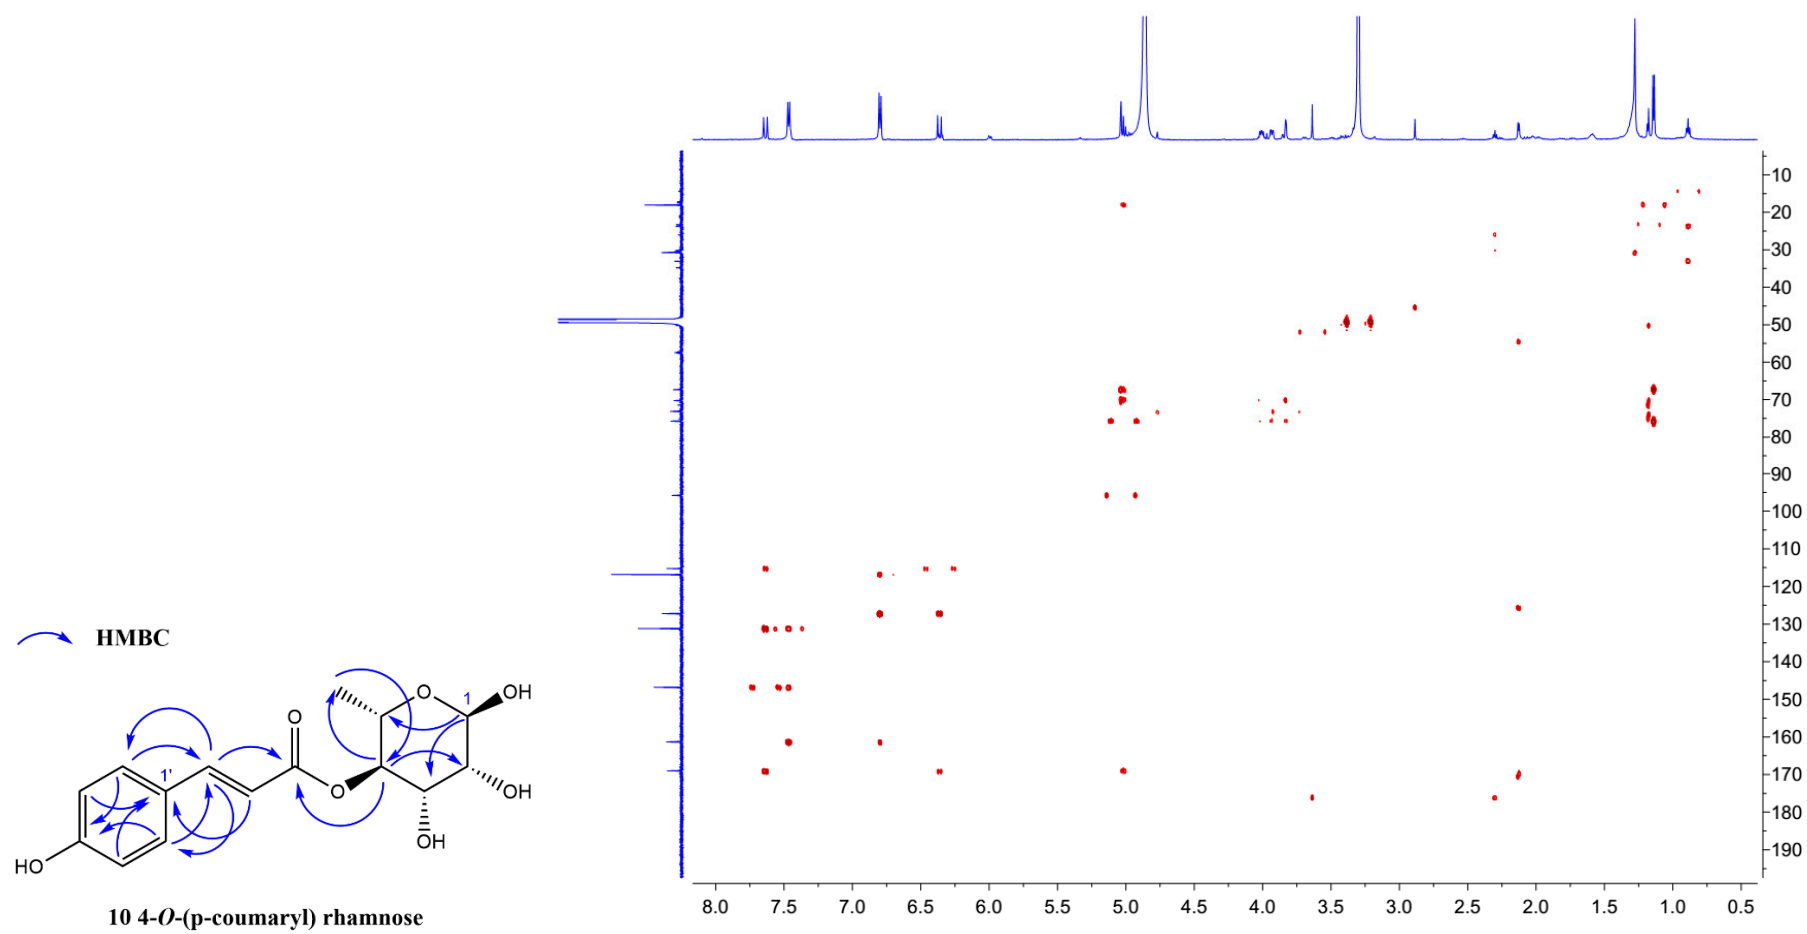

**Figure S9.** HMBC spectrum and key HMBC correlations of **10**

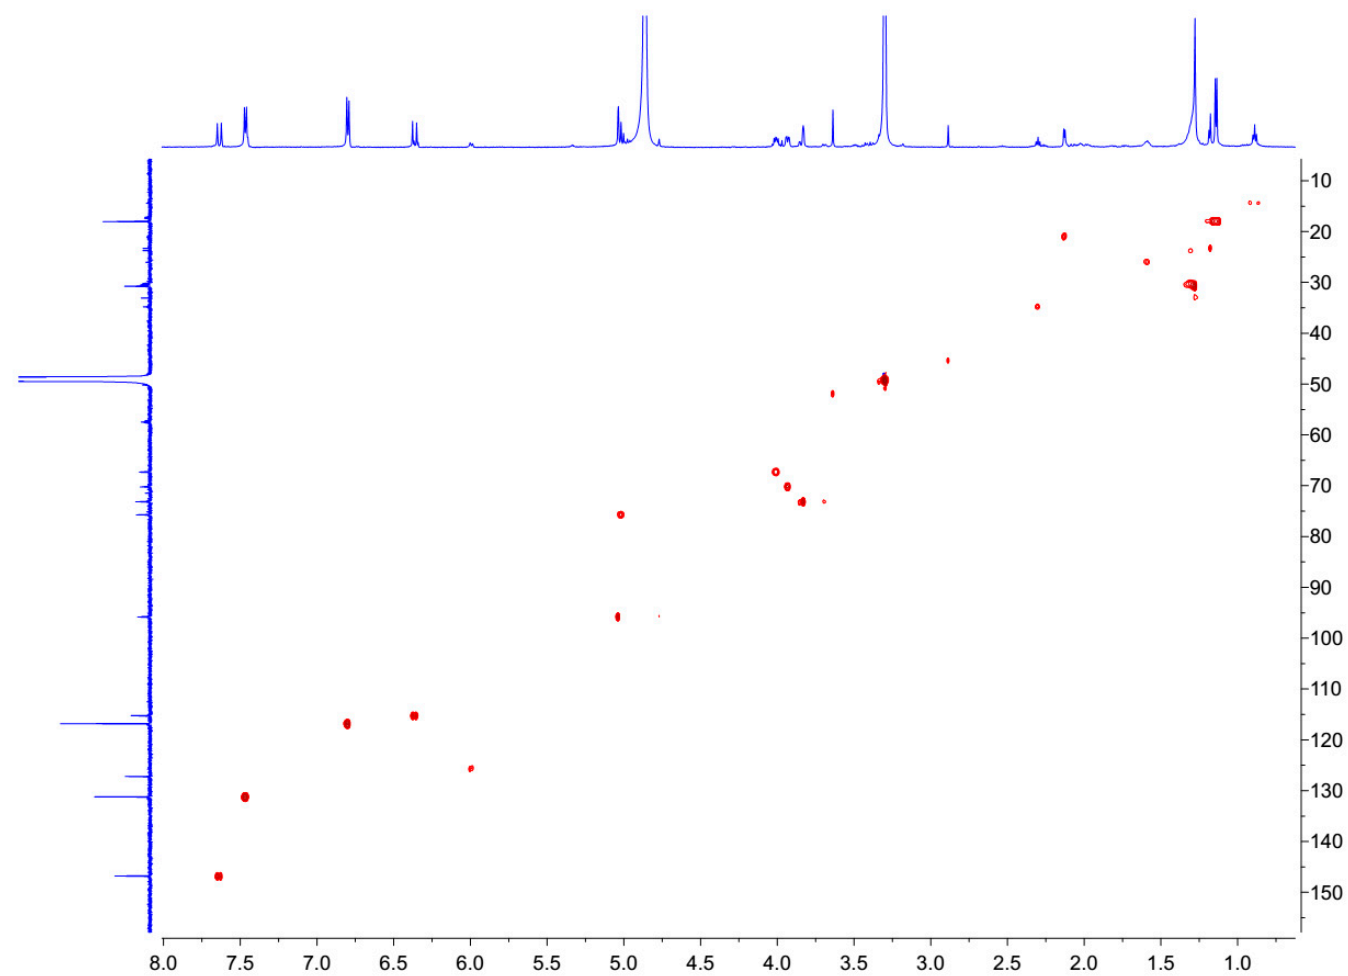

**Figure S10.** HSQC spectrum of **10**

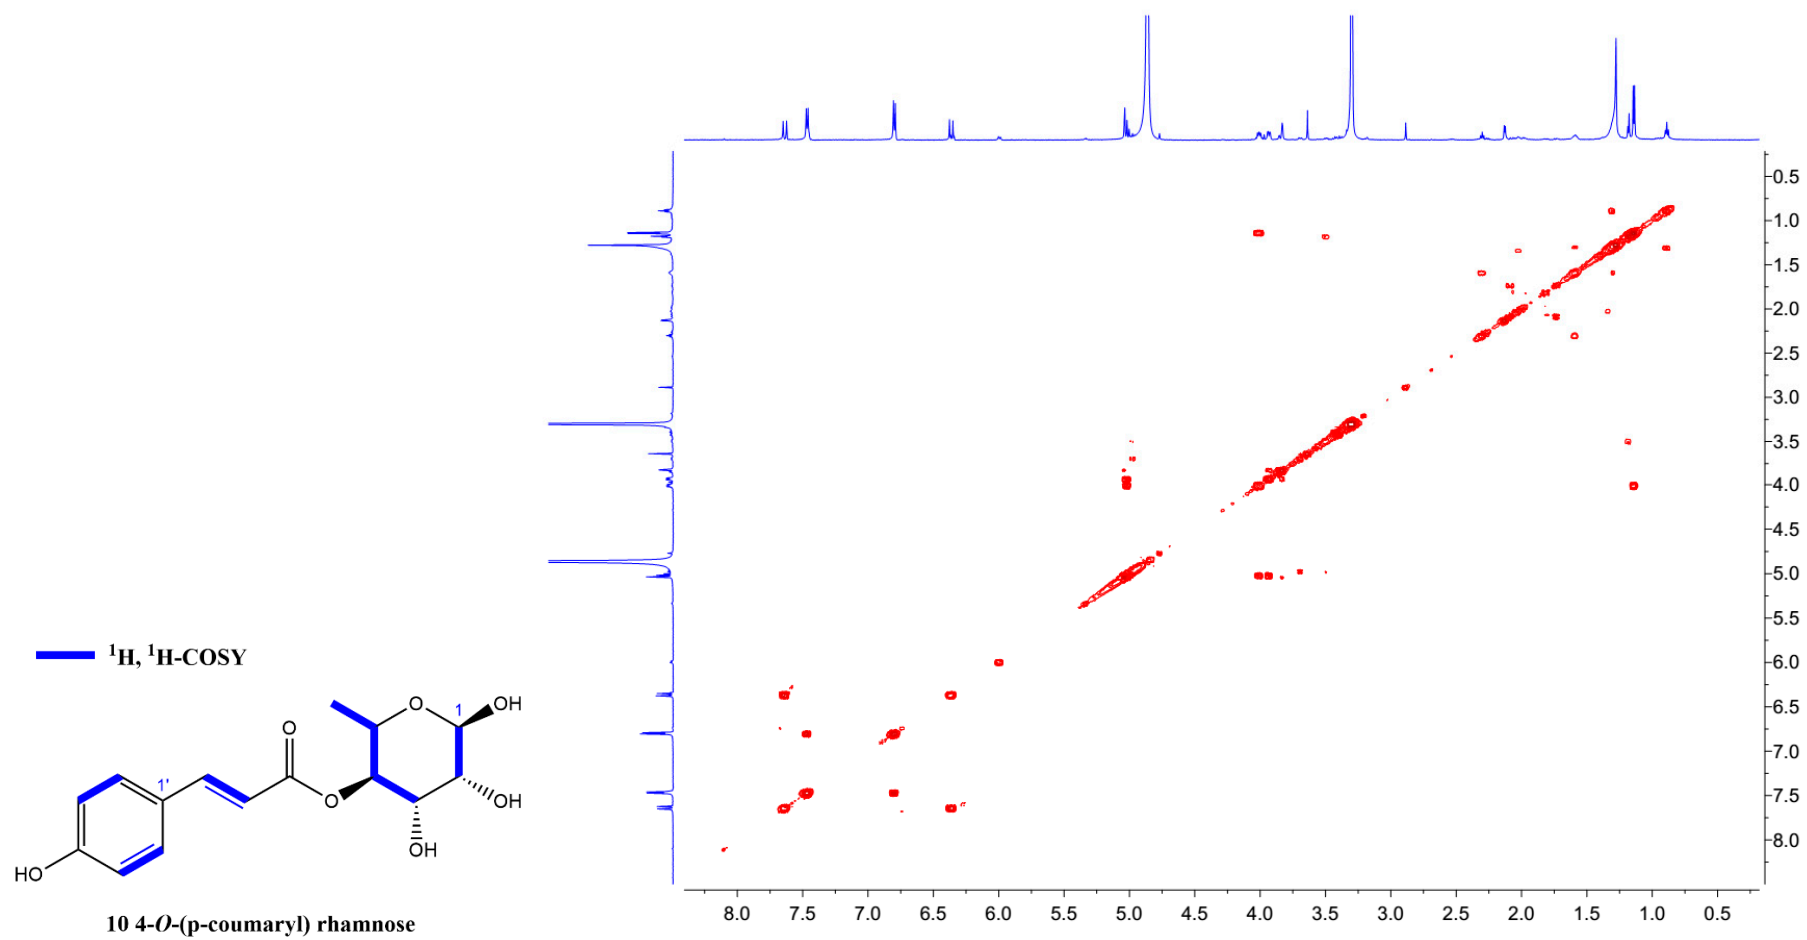

**Figure S11.**  $^1\text{H}$ ,  $^1\text{H}$ -COSY spectrum and key  $^1\text{H}$ ,  $^1\text{H}$ -COSY correlations of **10**

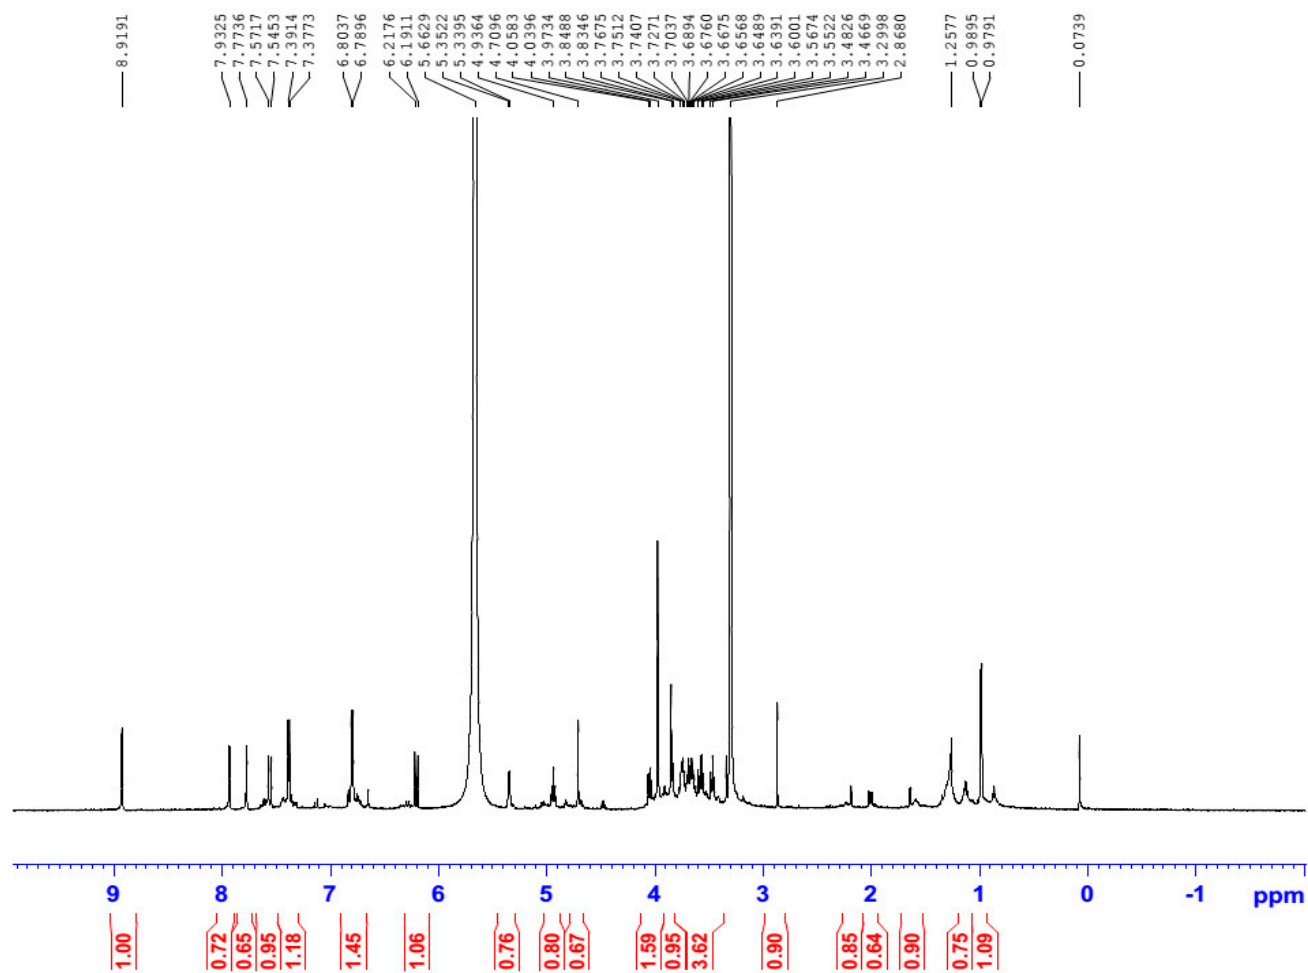

Figure S12. <sup>1</sup>H NMR spectrum (600 MHz, CD<sub>3</sub>OD/CF<sub>3</sub>COOD (9:1)) of **3**

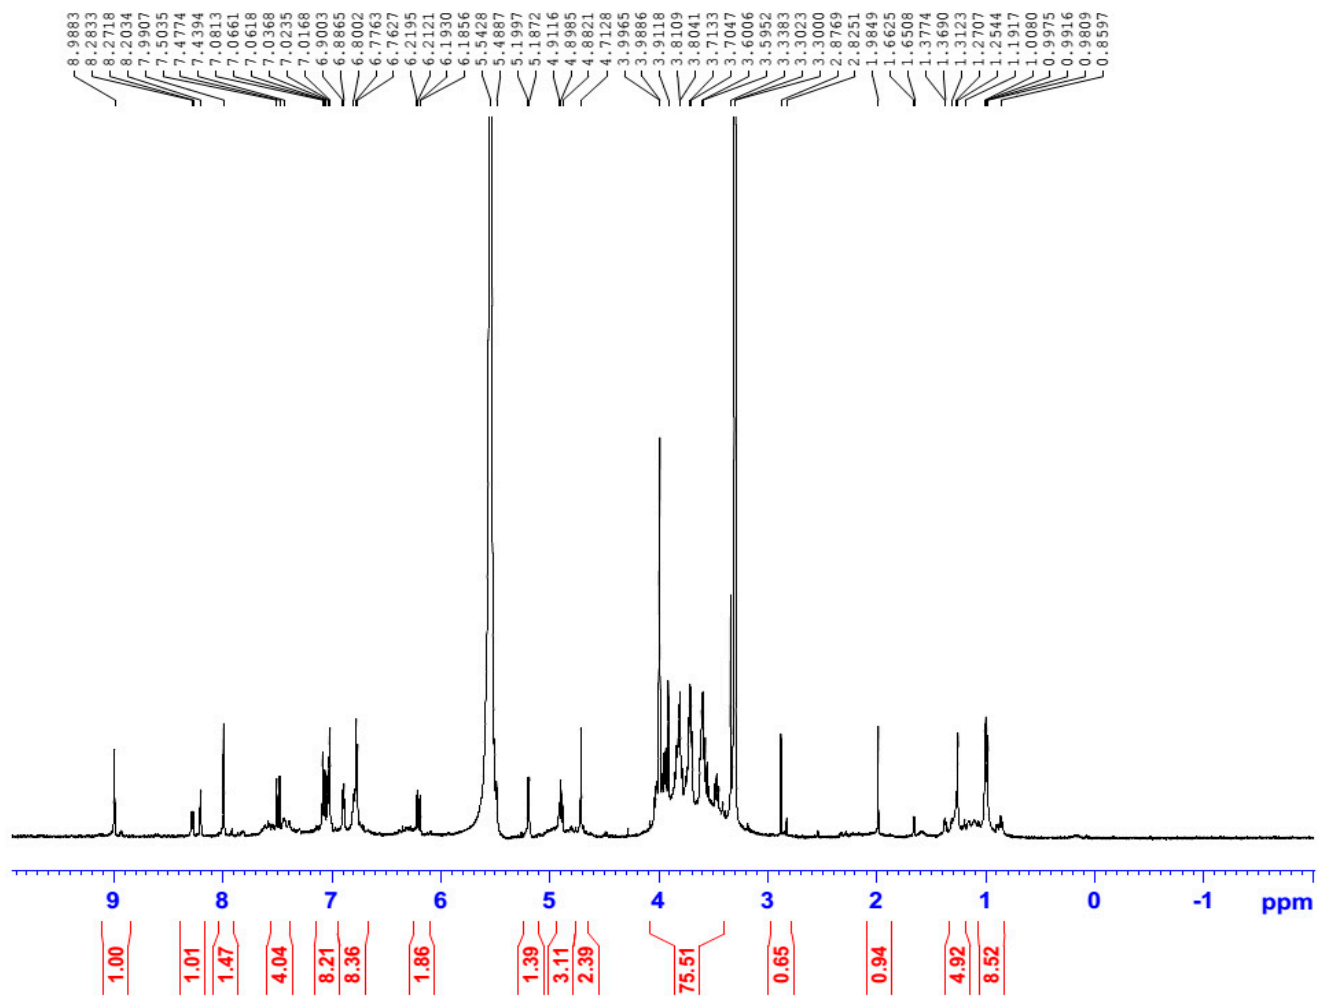

**Figure S13.**  $^1\text{H}$  NMR spectrum (600 MHz,  $\text{CD}_3\text{OD}/\text{CF}_3\text{COOD}$  (9:1)) of **12**

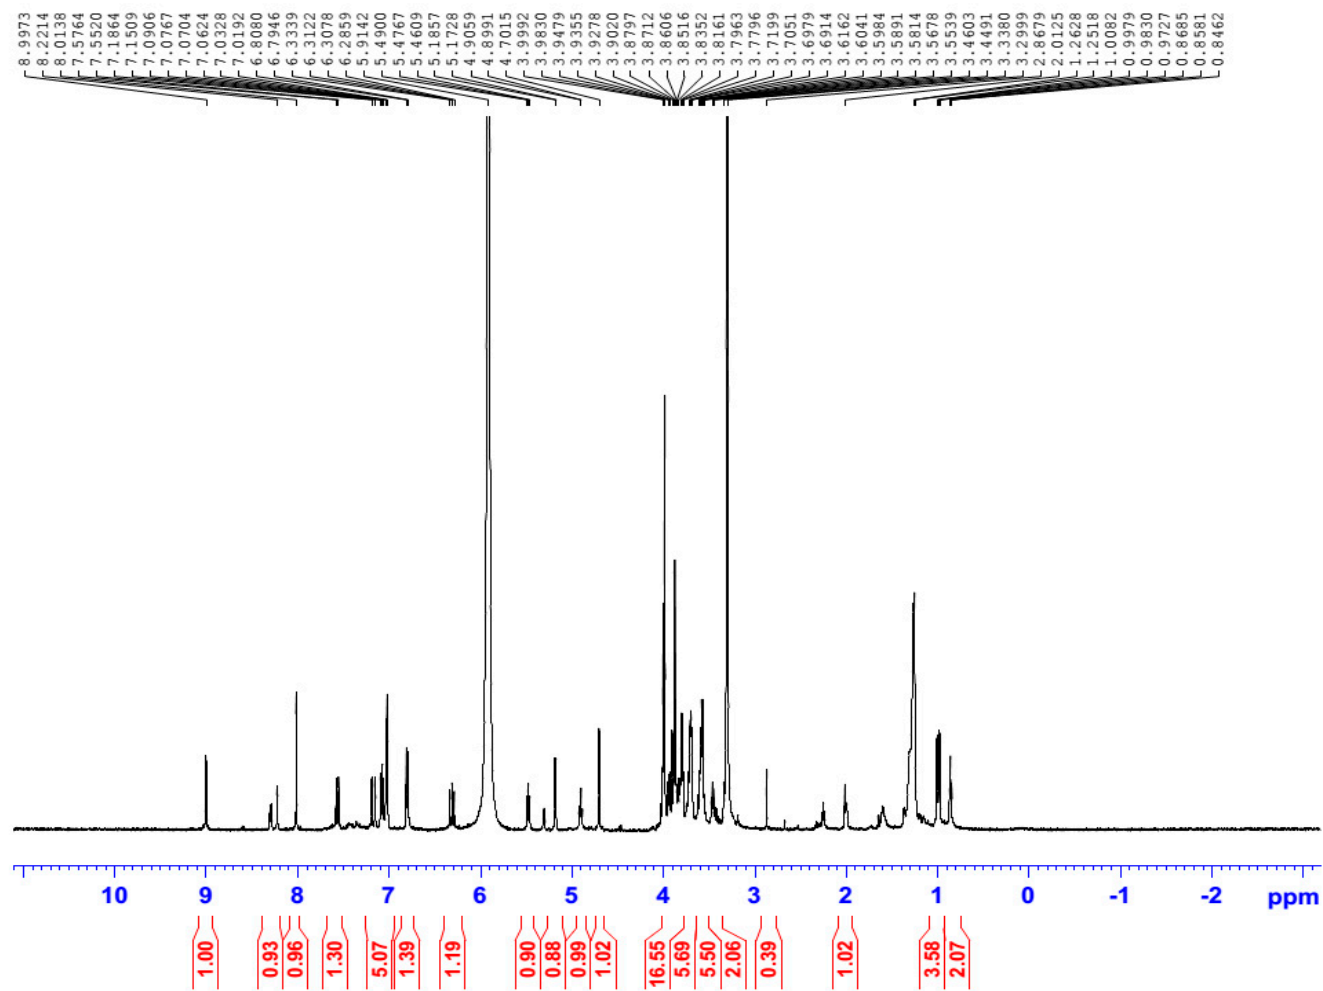

**Figure S14.**  $^1\text{H}$  NMR spectrum (600 MHz,  $\text{CD}_3\text{OD}/\text{CF}_3\text{COOD}$  (9:1)) of **15**



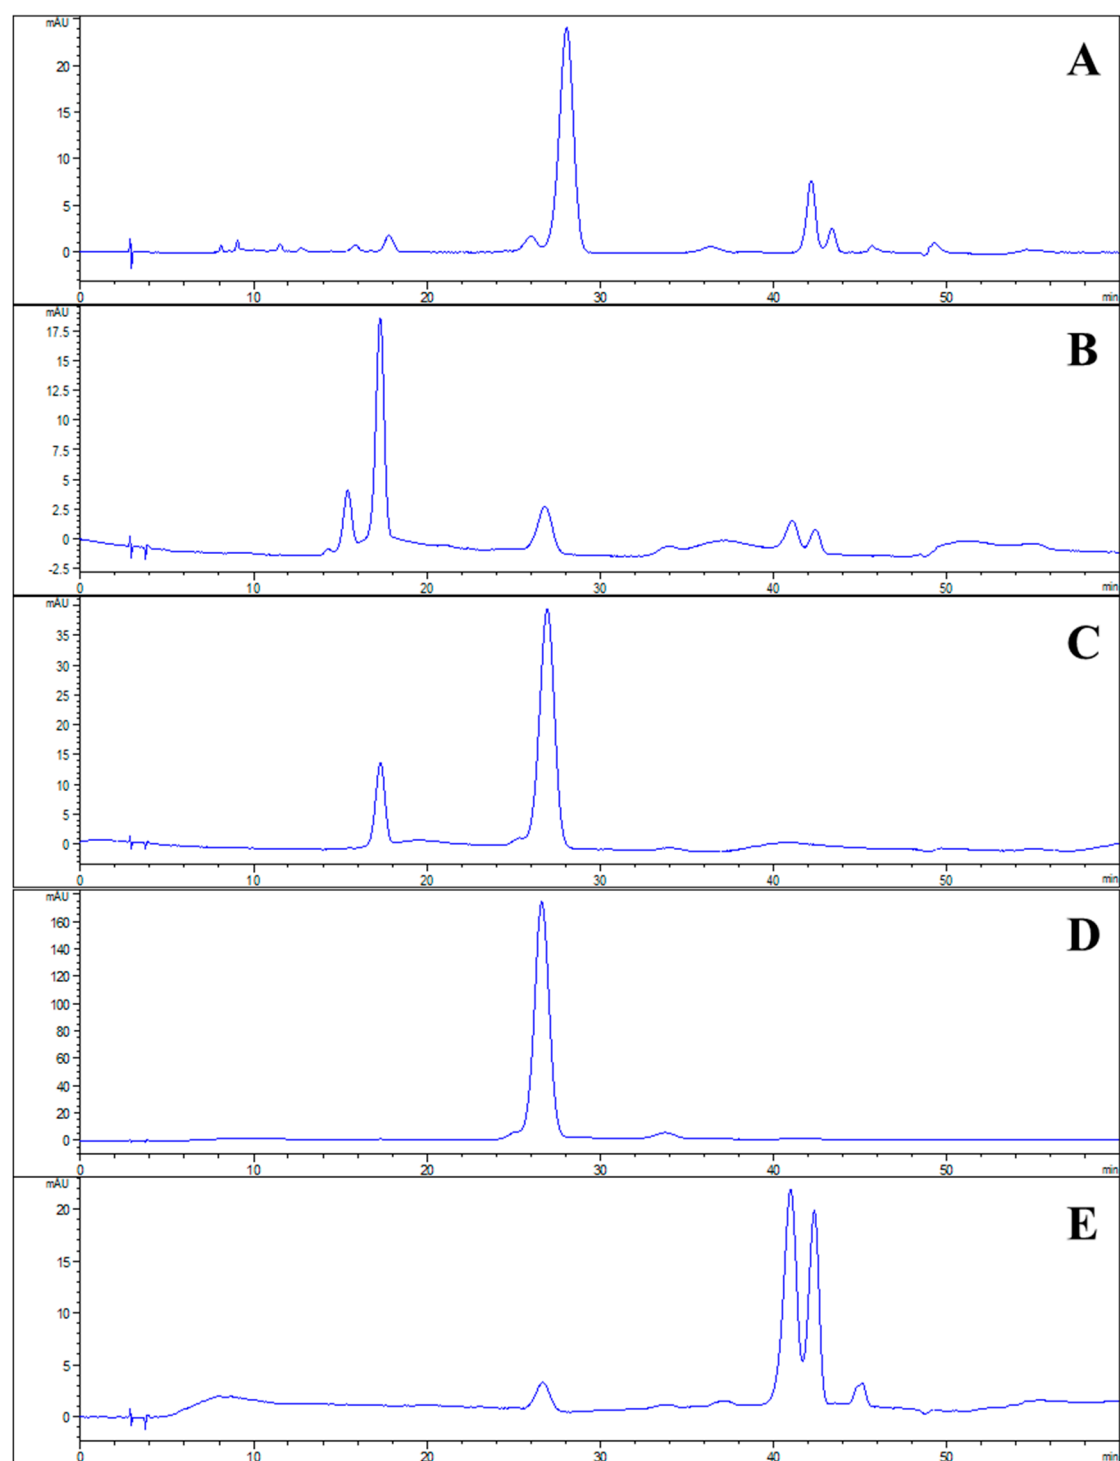

**Figure S15.** HPLC chromatography of *Solanum tuberosum* L. extract (A) and Fr.1~Fr.4 (B~E)

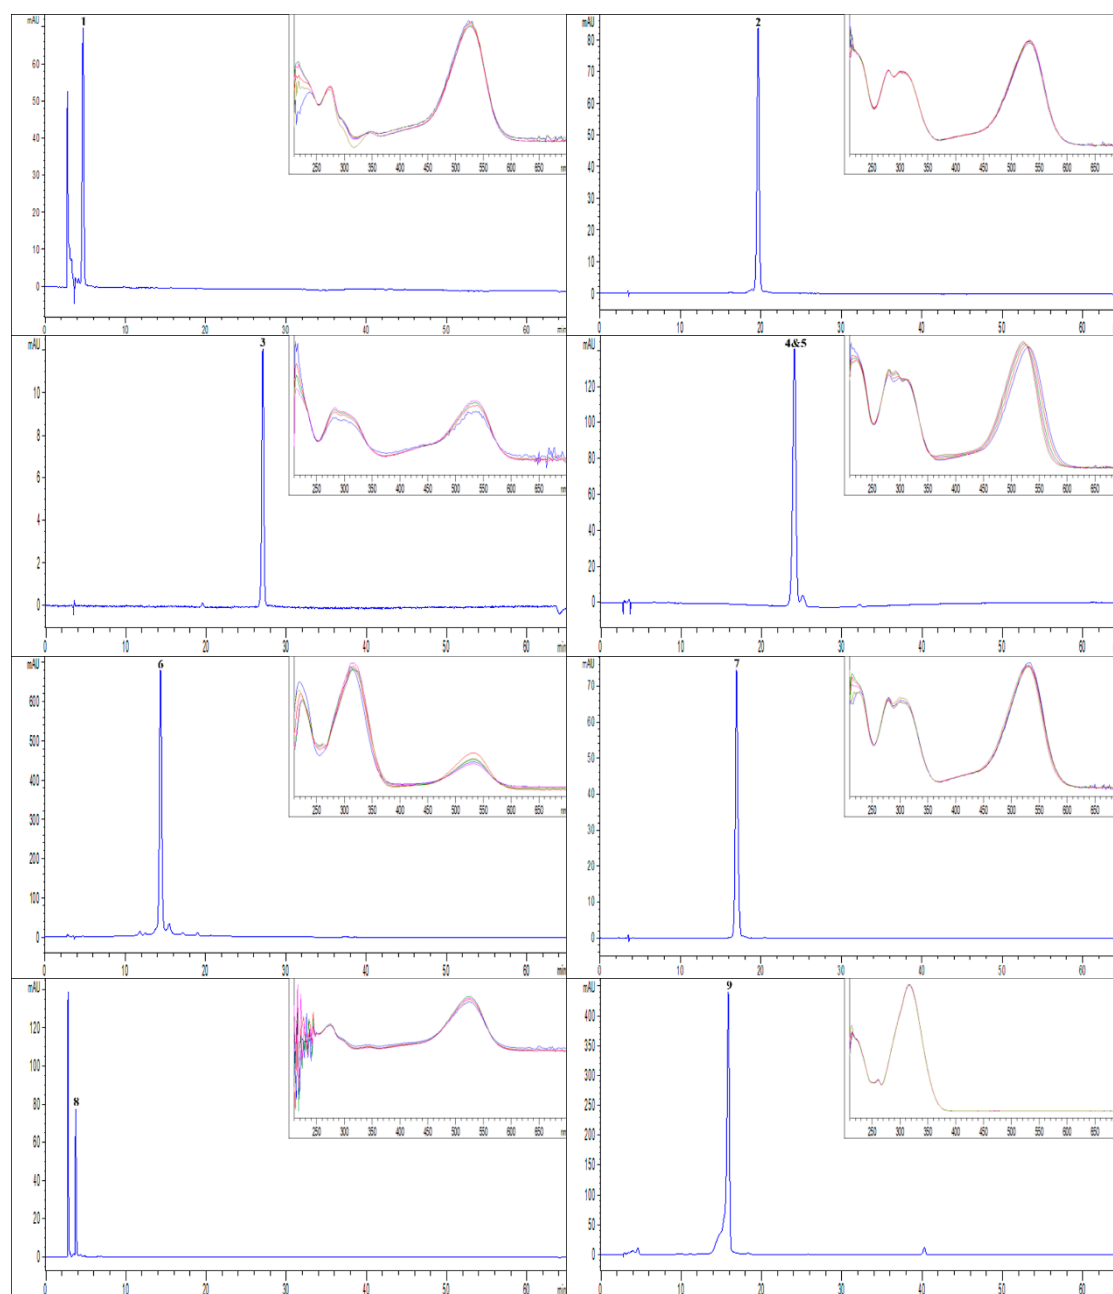

**Figure S16.** HPLC chromatography and spectrogram of **1-9**

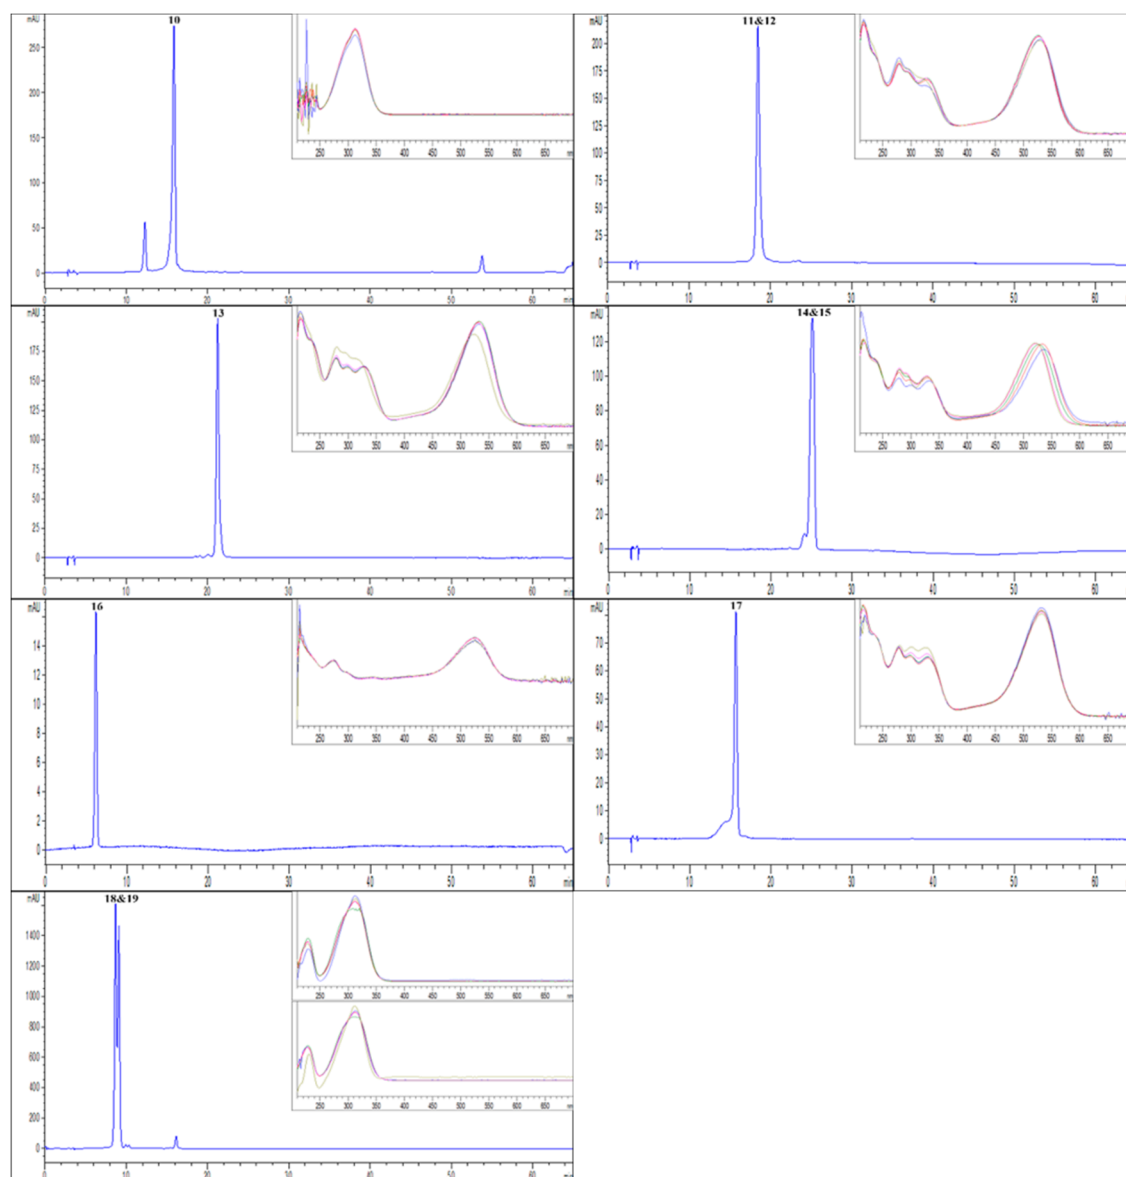

**Figure S17.** HPLC chromatography and spectrogram of 10~19

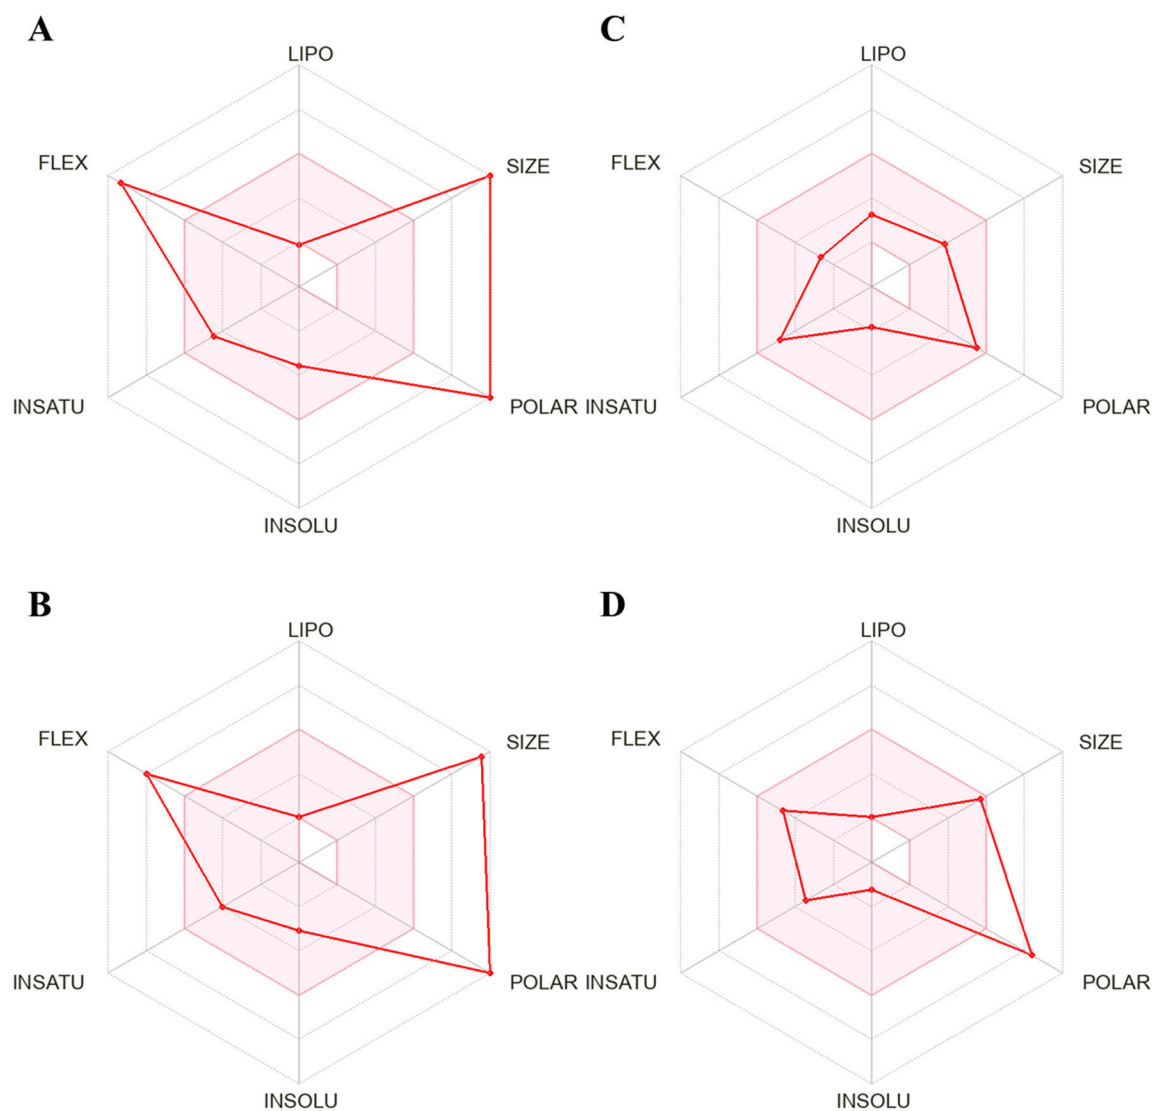

**Figure S18.** ADMET of (A) petanin, (B) norpetanin, (C) 4-O-(p-coumaryl) rhamnose, (D)

Lyciruthenylpropanoid D/E

**Table S1.** Retention time, purity and  $\lambda_{\text{max}}$  of anthocyanins and their degradation products by HPLC

| <b>Compound</b>  | <b>Retention time</b> | <b>Peak purity</b> | <b><math>\lambda_{\text{max}}</math></b> |
|------------------|-----------------------|--------------------|------------------------------------------|
| <b>No.</b>       | <b>(min)</b>          | <b>(%)</b>         | <b>(nm)</b>                              |
| <b>1</b>         | 4.731                 | 92.429             | 272, 528                                 |
| <b>2</b>         | 19.659                | 99.433             | 218, 280, 302, 531                       |
| <b>3</b>         | 27.072                | 100.000            | 218, 281, 300, 535                       |
| <b>4&amp;5</b>   | 24.097                | 92.654             | 220, 280, 292, 311, 520                  |
| <b>6</b>         | 14.379                | 91.233             | 223, 318, 531                            |
| <b>7</b>         | 15.564                | 99.421             | 228, 280, 300, 310, 530                  |
| <b>8</b>         | 3.719                 | 97.602             | 278, 300, 342, 525                       |
| <b>9</b>         | 15.863                | 94.839             | 221, 260, 317                            |
| <b>10</b>        | 15.854                | 85.905             | 313                                      |
| <b>11&amp;12</b> | 18.471                | 97.557             | 218, 280, 298, 330, 529                  |
| <b>13</b>        | 21.241                | 95.082             | 218, 280, 300, 330, 530                  |
| <b>14&amp;15</b> | 25.088                | 94.316             | 218, 280, 298, 330, 521                  |
| <b>16</b>        | 6.169                 | 100.000            | 273, 300, 341, 528                       |
| <b>17</b>        | 15.679                | 95.536             | 218, 280, 300, 330, 531                  |
| <b>18&amp;19</b> | 8.671/ 9.082          | 50.182/ 45.092     | 230, 311                                 |

**Table S2.** Tyrosinase inhibitory activity of anthocyanins and their degradation products (0.60 mM)

| NO.    | Compound name                                             | Molecular weight | Inhibitory ratio at 0.60 mM (%) |
|--------|-----------------------------------------------------------|------------------|---------------------------------|
| 1      | Petunidin 3-O-rutinoside-5-O-glucoside                    | 787.2291         | 83.05 ± 2.76                    |
| 2      | <b>Petanin</b>                                            | <b>933.2659</b>  | 93.25 ± 0.95                    |
| 3      | Petunidin 3-O-trans-p-coumaroylrutinoside                 | 771.2131         | 64.46 ± 3.09                    |
| 4/ 5   | Peonidin 3-O-trans-p-coumaroylrutinoside-5-O-glucoside    | 917.2710         | 66.74 ± 2.79                    |
|        | Malvidin 3-O-trans-p-coumaroylrutinoside-5-O-glucoside    | 947.2816         |                                 |
| 6      | Petunidin 3-O-trans-caffeoylrutinoside-5-O-glucoside      | 949.2608         | 87.01 ± 2.59                    |
| 7      | Delphinidin 3-O-trans-p-coumaroylrutinoside-5-O-glucoside | 919.2503         | 79.79 ± 2.35                    |
| 8      | Delphinidin 3-O-rutinoside-5-O-glucoside                  | 773.2135         | 86.47 ± 1.75                    |
| 9      | <b>Norpetanin</b>                                         | <b>810.2219</b>  | 94.31 ± 2.36                    |
| 10     | <b>4-O-(p-coumaryl) rhamnose</b>                          | <b>310.1053</b>  | 73.56 ± 0.90                    |
| 11/ 12 | Malvidin 3-O-trans-caffeoylrutinoside-5-O-glucoside       | 963.2765         | 47.01 ± 3.19                    |
|        | Peonidin 3-O-trans-caffeoylrutinoside-5-O-glucoside       | 933.2659         |                                 |
| 13     | Petunidin 3-O-feruloylrutinoside-5-O-glucoside            | 963.2765         | 48.83 ± 2.59                    |
| 14/ 15 | Malvidin 3-O-feruloylrutinoside-5-O-glucoside             | 977.2921         | 67.29 ± 2.85                    |
|        | Peonidin 3-O-feruloylrutinoside-5-O-glucoside             | 947.2816         |                                 |
| 16     | Petunidin 3,5-di-O-glucoside                              | 641.1712         | 90.40 ± 1.58                    |
| 17     | Peonidin 3-O-rutinoside-5-O-glucoside                     | 771.2342         | 57.79 ± 2.81                    |
| 18&19  | <b>Lyciruthenylpropanoid D</b>                            | <b>472.1581</b>  | 90.30 ± 4.79                    |
|        | <b>Lyciruthenylpropanoid E</b>                            |                  |                                 |

**Table S3.** Maximum tolerated concentration of Petanin in zebrafish (n=30)

| <b>Group</b>   | <b>Content<br/>(%)</b> | <b>Death count<br/>(Tail)</b> | <b>Death rate<br/>(%)</b> | <b>Phenotype</b>          |
|----------------|------------------------|-------------------------------|---------------------------|---------------------------|
| <b>Normal</b>  | /                      | 0                             | 0                         | No obvious<br>abnormality |
|                | 0.002                  | 0                             | 0                         | ns                        |
|                | 0.02                   | 0                             | 0                         | ns                        |
|                | 0.05                   | 0                             | 0                         | ns                        |
|                | 0.1                    | 0                             | 0                         | ns                        |
| <b>Petanin</b> | <b>0.15</b>            | <b>1</b>                      | <b>3</b>                  | <b>ns</b>                 |
|                | 0.20                   | 6                             | 20                        | /                         |
|                | 0.25                   | 12                            | 40                        | /                         |
|                | 0.5                    | 30                            | 100                       | /                         |

Note: ns means that there is no significant difference compared with the normal group.
